# Supplementary material for: Synergetic effect of Cu active sites and oxygen vacancies in Cu/CeO2–ZrO2 for the water–gas shift reaction
Source: Royal Society of Chemistry journal article supplement (doi:10.1039/d0cy02462g), 2021-01-01
Supplement: d0cy02462g1.pdf [file d0cy02462g1.pdf]

## Supplementary Information

### **Synergetic effect of Cu active sites and oxygen vacancies in Cu/CeO<sub>2</sub>-ZrO<sub>2</sub> for water-gas shift reaction**

Yuanwu Hu, Na Wang, Zhiming Zhou\*

*School of Chemical Engineering*

*East China University of Science and Technology*

*Shanghai 200237, China*

\* Corresponding author: zmzhou@ecust.edu.cn; Tel.: +86-21-64252230; Fax: +86-21-64253528.

**Table S1** CO conversion and turnover frequency (TOF) data of different 20CuCe<sub>y</sub>Zr<sub>1-y</sub><sup>a</sup>

| Catalyst                                | CO conversion (%) |        |        |        | TOF <sup>a</sup> (s <sup>-1</sup> ) |        |        |        |
|-----------------------------------------|-------------------|--------|--------|--------|-------------------------------------|--------|--------|--------|
|                                         | 240 °C            | 260 °C | 280 °C | 300 °C | 240 °C                              | 260 °C | 280 °C | 300 °C |
| 20CuCe                                  | 2.2               | 3.9    | 5.9    | 8.2    | 0.0087                              | 0.0155 | 0.0234 | 0.0325 |
| 20CuCe <sub>0.8</sub> Zr <sub>0.2</sub> | 3.5               | 6.5    | 8.9    | 12.1   | 0.0069                              | 0.0128 | 0.0175 | 0.0238 |
| 20CuCe <sub>0.6</sub> Zr <sub>0.4</sub> | 4.8               | 7.5    | 11.3   | 14.9   | 0.0061                              | 0.0095 | 0.0144 | 0.0189 |
| 20CuCe <sub>0.4</sub> Zr <sub>0.6</sub> | 3.9               | 6.3    | 9.1    | 12.9   | 0.0055                              | 0.0089 | 0.0128 | 0.0182 |
| 20CuCe <sub>0.2</sub> Zr <sub>0.8</sub> | 1.6               | 2.5    | 4.1    | 5.9    | 0.0062                              | 0.0096 | 0.0158 | 0.0227 |
| 20CuZr                                  | 0.1               | 0.3    | 0.5    | 0.7    | 0.0021                              | 0.0047 | 0.0079 | 0.0113 |

<sup>a</sup> Reaction condition: H<sub>2</sub>:CO:H<sub>2</sub>O = 1:2:2 (molar ratio), P = 0.1 MPa, GHSV = 80000 h<sup>-1</sup>.

**Table S2** Raman analysis results for spent 20CuCe<sub>y</sub>Zr<sub>1-y</sub>

| Catalyst                                | <i>N</i> (cm <sup>-3</sup> ) <sup>a</sup> |
|-----------------------------------------|-------------------------------------------|
| 20CuCe                                  | 2.1×10 <sup>21</sup>                      |
| 20CuCe <sub>0.8</sub> Zr <sub>0.2</sub> | 3.9×10 <sup>21</sup>                      |
| 20CuCe <sub>0.6</sub> Zr <sub>0.4</sub> | 5.5×10 <sup>21</sup>                      |
| 20CuCe <sub>0.4</sub> Zr <sub>0.6</sub> | 4.2×10 <sup>21</sup>                      |
| 20CuCe <sub>0.2</sub> Zr <sub>0.8</sub> | 1.6×10 <sup>21</sup>                      |
| 20CuZr                                  | —                                         |

<sup>a</sup> Concentration of oxygen vacancies (*N*) is acquired by Raman analysis.

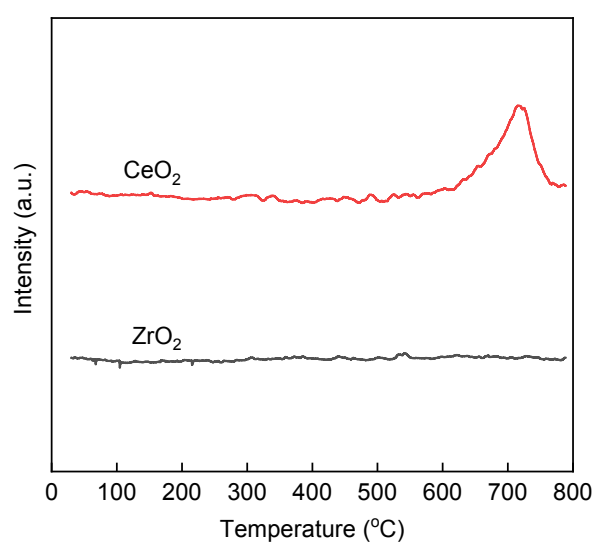**Fig. S1.** H<sub>2</sub>-TPR profiles of CeO<sub>2</sub> and ZrO<sub>2</sub>.

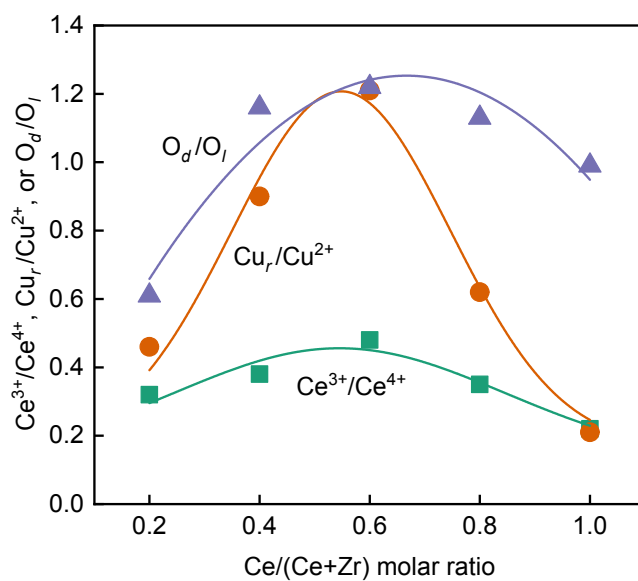

**Fig. S2.** Variation of  $Ce^{3+}/Ce^{4+}$ ,  $Cu_r/Cu^{2+}$  and  $O_d/O_l$  ratios with  $Ce/(Ce+Zr)$  molar ratio for  $20CuCe_yZr_{1-y}$  catalysts (symbols: experimental data; lines: fitted data by Gaussian function).

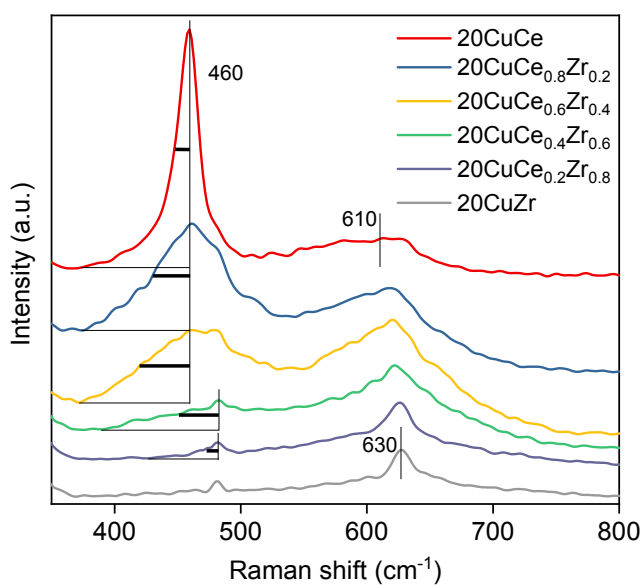

**Fig. S3.** Raman spectra of  $20CuCe_yZr_{1-y}$  catalysts (HWHM is indicated by the thick solid black line).

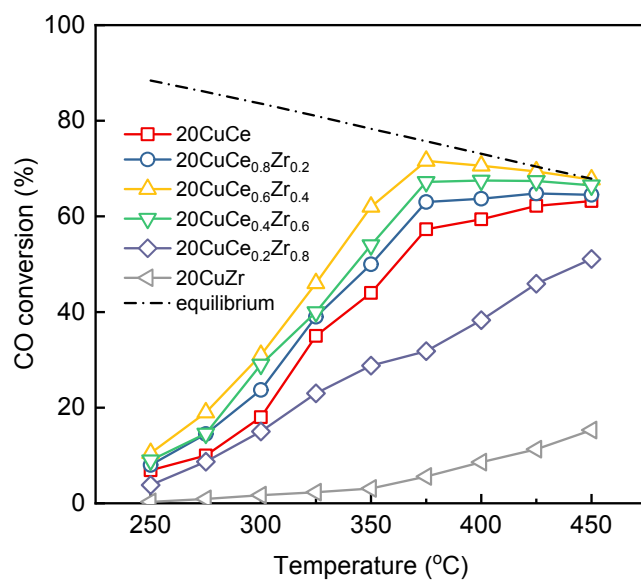

**Fig. S4.** Variation of CO conversion with temperature over  $20\text{CuCe}_y\text{Zr}_{1-y}$  catalysts. (reaction condition:  $\text{H}_2:\text{CO}:\text{H}_2\text{O} = 1:2:2$  (molar ratio),  $P = 0.1$  MPa,  $\text{GHSV} = 20000$   $\text{h}^{-1}$ )

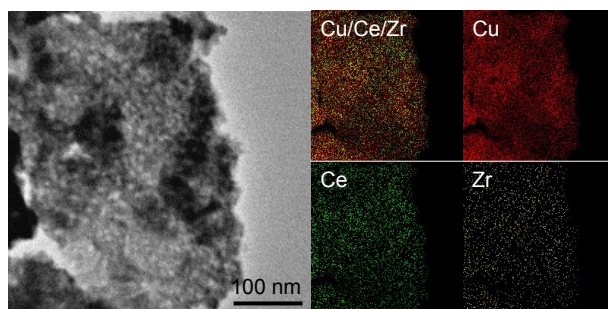

**Fig. S5.** HRTEM-EDS mappings of  $50\text{CuCe}_{0.6}\text{Zr}_{0.4}$ .

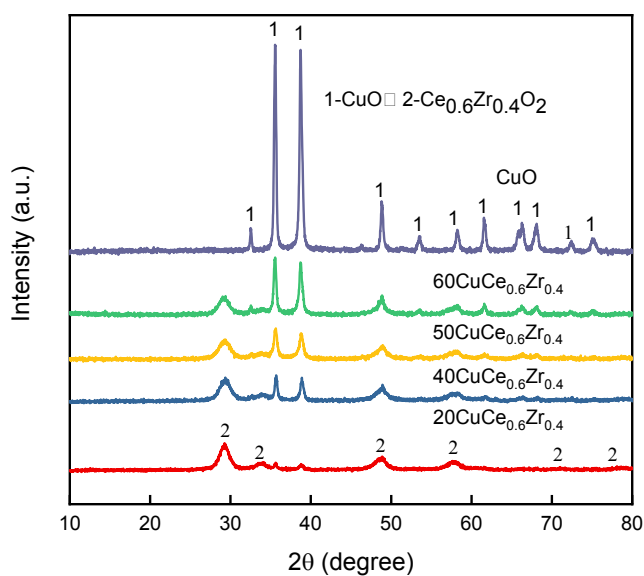

**Fig. S6.** XRD patterns of  $x\text{CuCe}_{0.6}\text{Zr}_{0.4}$  catalysts with varying Cu loading.

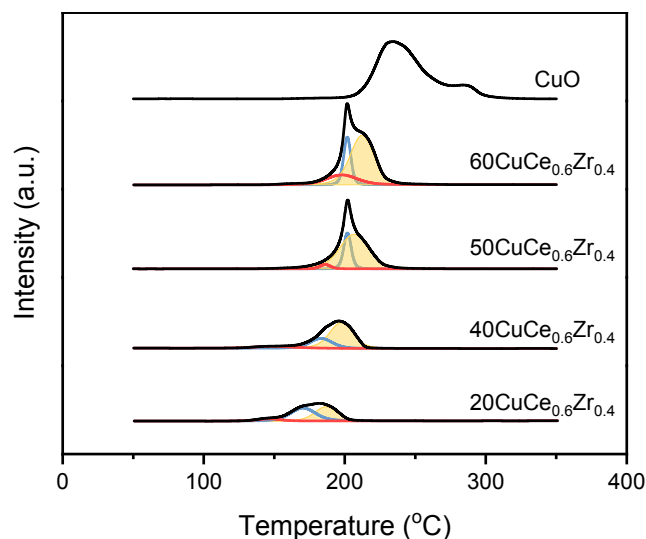

**Fig. S7.**  $\text{H}_2$ -TPR profiles of  $x\text{CuCe}_{0.6}\text{Zr}_{0.4}$  catalysts with varying Cu loading.

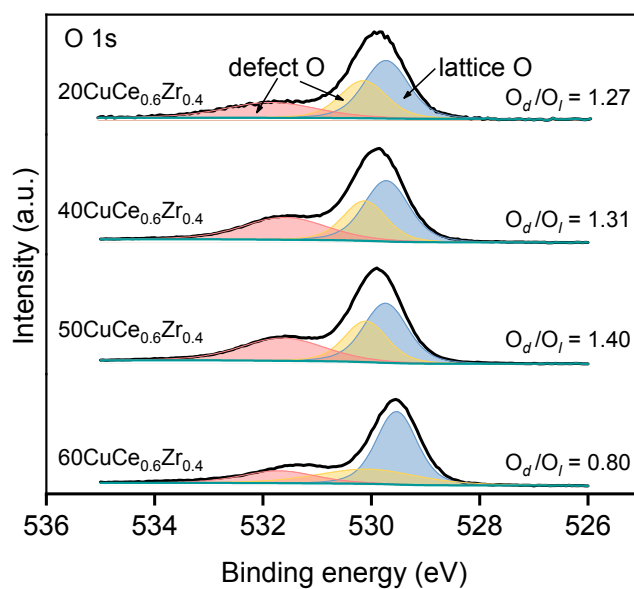

**Fig. S8.** XPS spectra of O 1s of  $x\text{CuCe}_{0.6}\text{Zr}_{0.4}$  catalysts with varying Cu loading.

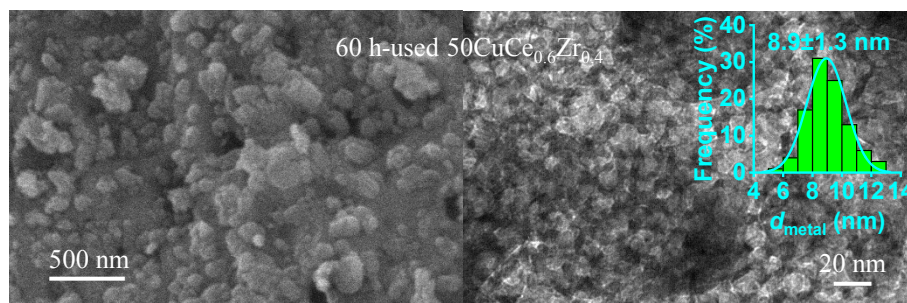

**Fig. S9.** FESEM (left) and HRTEM (right) images of 60 h-used  $50\text{CuCe}_{0.6}\text{Zr}_{0.4}$ .

(reaction condition:  $\text{H}_2:\text{CO}:\text{H}_2\text{O} = 1:2:2$  (molar ratio),  $T = 350\text{ }^\circ\text{C}$ ,  $P = 0.1\text{ MPa}$ ,  $\text{GHSV} = 20000\text{ h}^{-1}$ )
